# Supplementary material
Source: publisher site journal article supplement (https://www.dovepress.com/article/563439)
Supplement: Supplementary file 1 [file 563439_Supporting%20information-revision%20CLEAN_1.docx]

**Supporting Information**

**Table of contents**

[Figure S1. Stability evaluation of BPNS-based nanosystems 2](#_Toc213603983)

[Figure S2. pH-dependent size variation. 2](#_Toc213603984)

[Figure S3. GSH depletion by the BPNS@Cu-PEG nanoplatform. 3](#_Toc213603985)

[Figure S4. Catalytic degradation of methylene blue (MB) by BPNS@Cu-PEG. 3](#_Toc213603986)

[Figure S5. Radiation-enhanced reactive oxygen generation. 4](#_Toc213603987)

[Figure S6. Oxygen generation kinetics of BPNS@Cu-PEG. 4](#_Toc213603988)

[Figure S7. Cellular uptake kinetics of Cy5-labeled BPNS@Cu-PEG. 5](#_Toc213603989)

[Figure S8. Cytocompatibility and radiosensitivity profiling. 5](#_Toc213603990)

[Figure S9. In vivo antitumor efficacy. 6](#_Toc213603991)

[Figure S10. Serum cytokine levels of IFN-γ treatment. 6](#_Toc213603992)

[Figure S11. Systemic safety evaluation of different treatments. 7](#_Toc213603993)

[Figure S12. Hemocompatibility assessment of BPNS@Cu-PEG. 7](#_Toc213603994)

[Figure S13. Histopathological analysis of major organ sections. 8](#_Toc213603995)

[Figure S14. Evaluation of treatment-induced systemic toxicity via serum biochemistry. 9](#_Toc213603996)


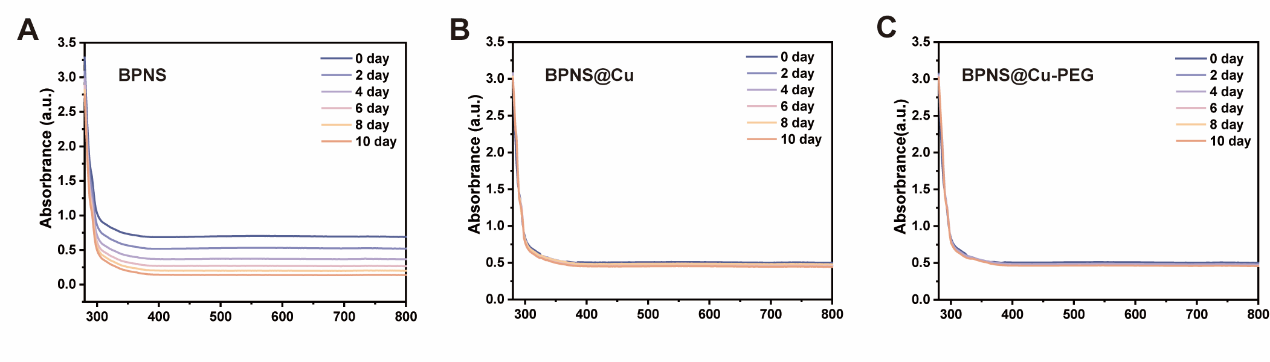


Figure S1. Stability evaluation of BPNS-based nanosystems. Absorption spectra of (A) BPNS, (B) BPNS@Cu, and (C) BPNS@Cu-PEG monitored over 10 days at room temperature.


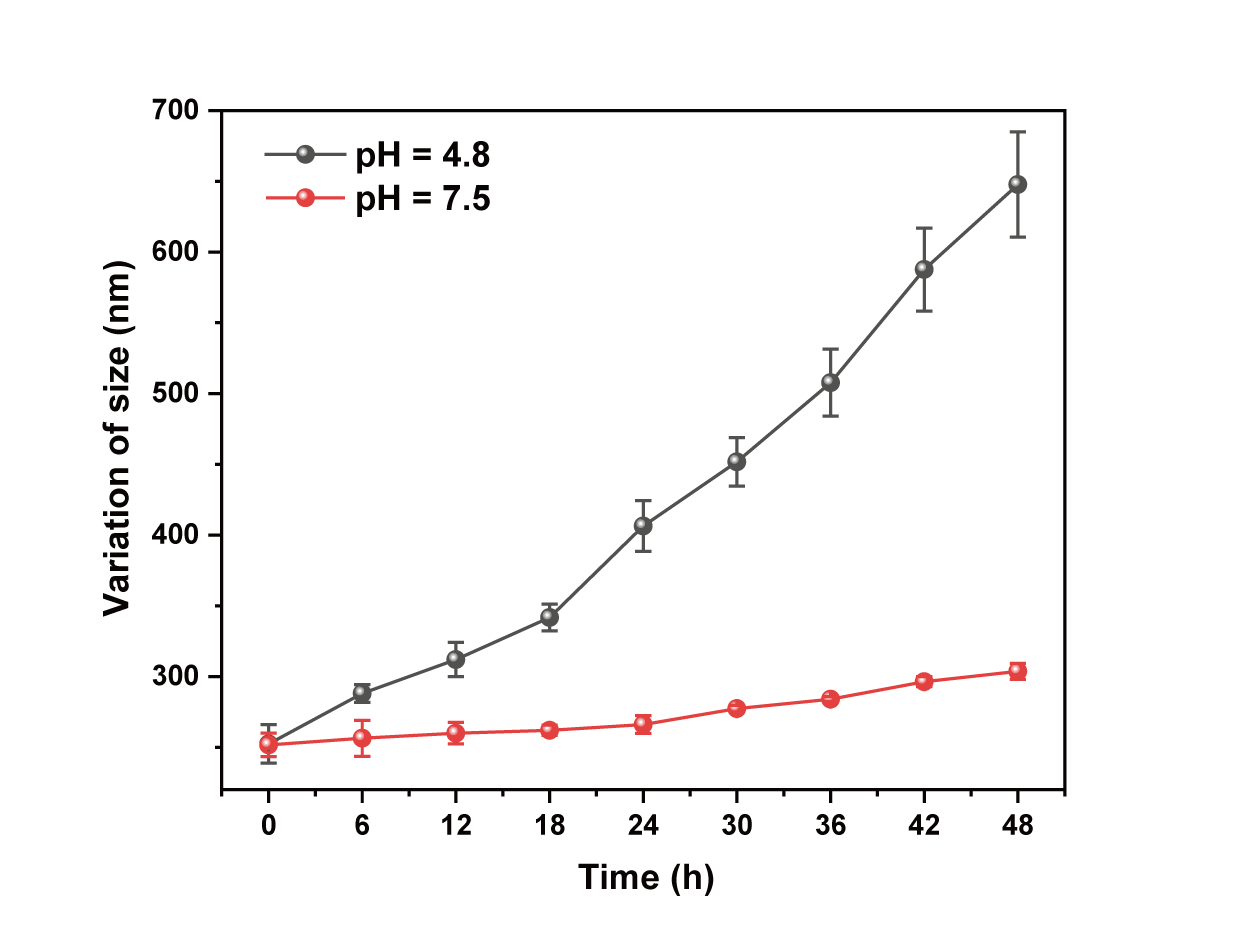


Figure S2. pH-dependent size variation. Particle size change of BPNS@Cu-PEG under different pH conditions over 48 h. Data represent mean ± s.d.; *n* = 3 biologically independent samples.


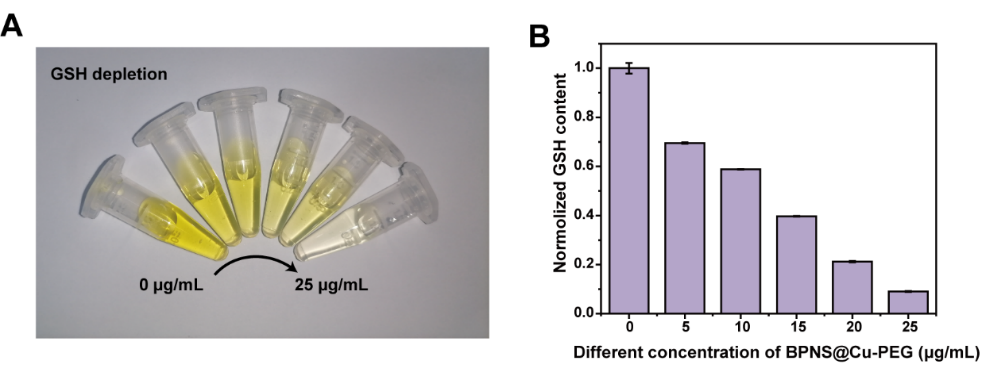


Figure S3. GSH depletion by the BPNS@Cu-PEG nanoplatform. (A) Visual color change of DTNB after reaction with increasing concentrations (0–25 μg/mL) of BPNS@Cu-PEG. (B) Quantitative analysis of normalized intracellular GSH levels following treatment with the nanoplatform. Data represent mean ± s.d.; *n* = 3 biologically independent samples.


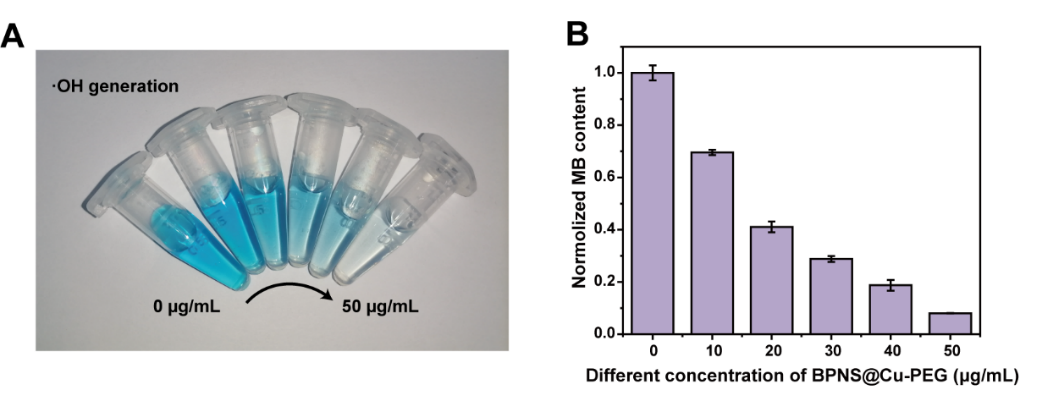


Figure S4. Catalytic degradation of methylene blue (MB) by BPNS@Cu-PEG. (A) Visual fading of MB solution after treatment with increasing concentrations of BPNS@Cu-PEG (B) Normalized absorbance change of MB following incubation with the nanoplatform. Error bars represent mean ± s.d.; *n* = 3 biologically independent experiments.


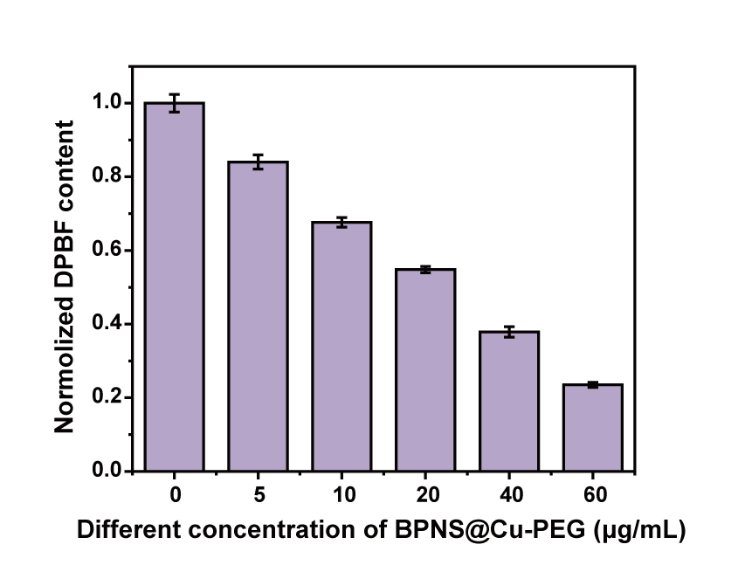


Figure S5. Radiation-enhanced reactive oxygen generation. Normalized absorbance of DPBF at 410 nm after treatment with varying concentrations of BPNS@Cu-PEG under 3 Gy X-ray irradiation. Data are presented as mean ± s.d. of three independent experiments.


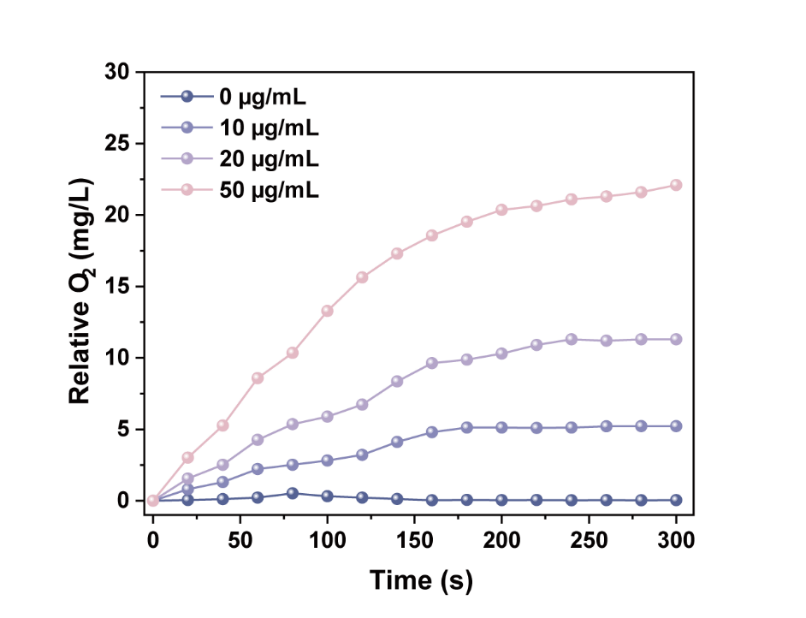


Figure S6. Oxygen generation kinetics of BPNS@Cu-PEG.Time-dependent O₂ production profiles following treatment with different concentrations of the nanoplatform.


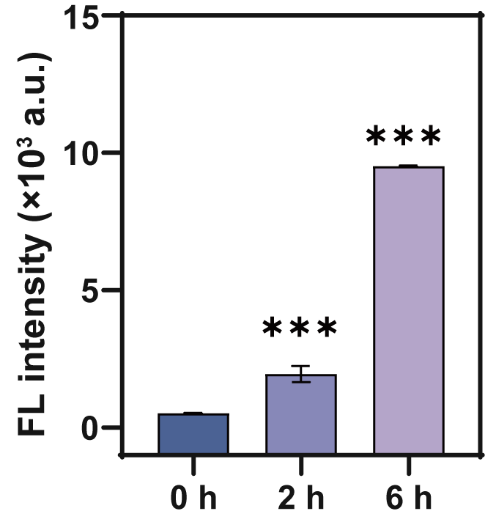


Figure S7. Cellular uptake kinetics of Cy5-labeled BPNS@Cu-PEG. Flow cytometry quantification of intracellular fluorescence intensity in cells incubated with the nanoplatform for 0, 2, and 6 hours. Data represent mean ± s.d.; *n* = 3 independent experiments. Statistical significance was calculated via by one-way analysis of variance (ANOVA). ****P* < 0.001.


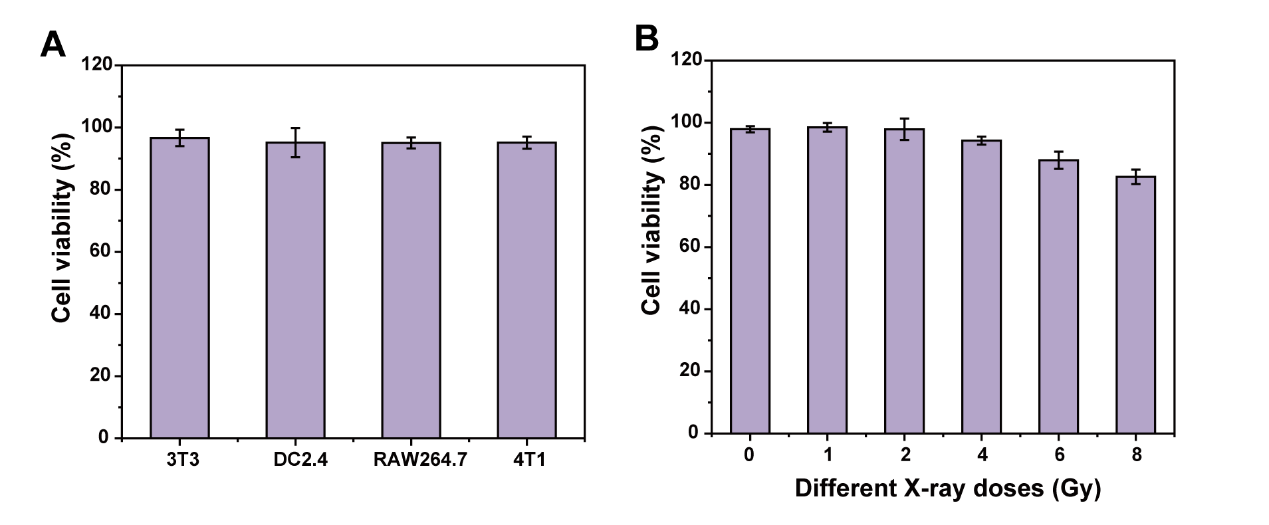


Figure S8. Cytocompatibility and radiosensitivity profiling.(A) Viability of NIH3T3, DC2.4, RAW264.7, and 4T1 cells after 24 h treatment with 120 μg/mL of BPNS. (B) Viability of 4T1 tumor cells treated with increasing doses of radiation alone. Data represent mean ± s.d.; *n* = 3 biologically independent experiments.


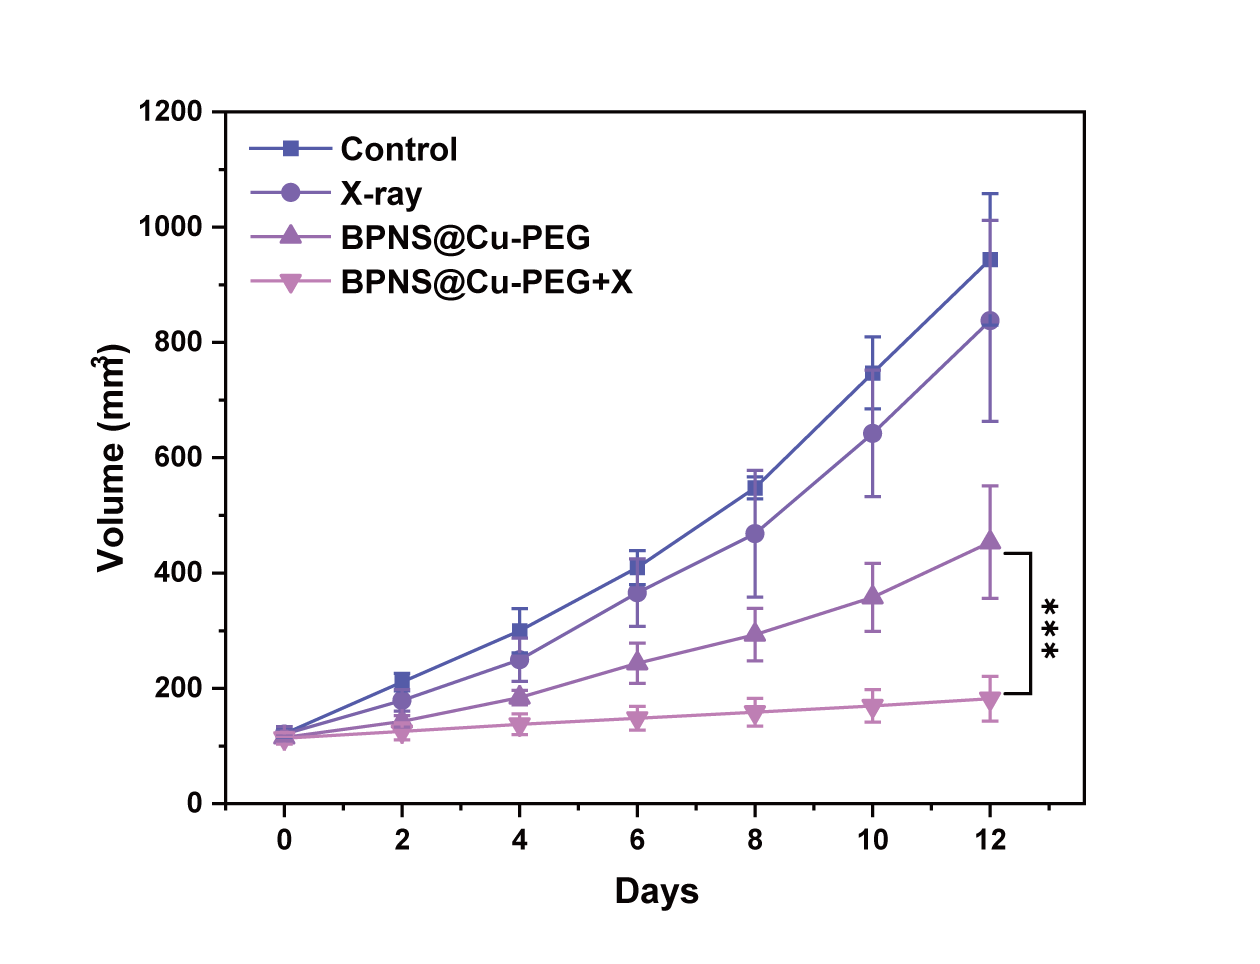


Figure S9. In vivo antitumor efficacy. Tumor growth curves following different treatments. Data are presented as mean ± s.d.; *n* = 5 mice per group. Statistical significance was calculated via by two-way analysis of variance. *** *P* < 0.001.


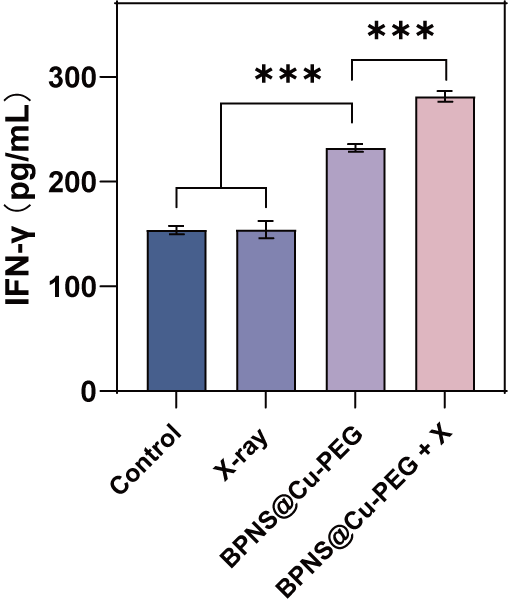


Figure S10. Plasma cytokine levels of IFN-γ treatment. Data are representative of three independent experiments (mean ± s.d.; *n* = 3 biologically independent samples) Statistical significance was calculated via by one-way analysis of variance (ANOVA). ****P* < 0.001.


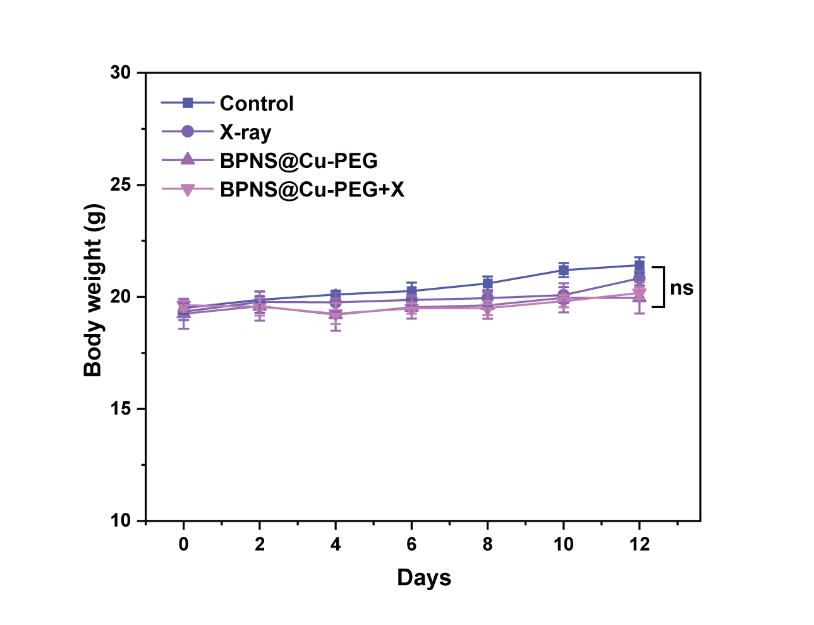


Figure S11. Systemic safety evaluation of different treatments. Body weight changes of tumor-bearing mice over the course of therapy. Data are presented as mean ± s.d.; *n* = 5 mice per group. Statistical significance was calculated via by two-way analysis of variance. ns: no significance.


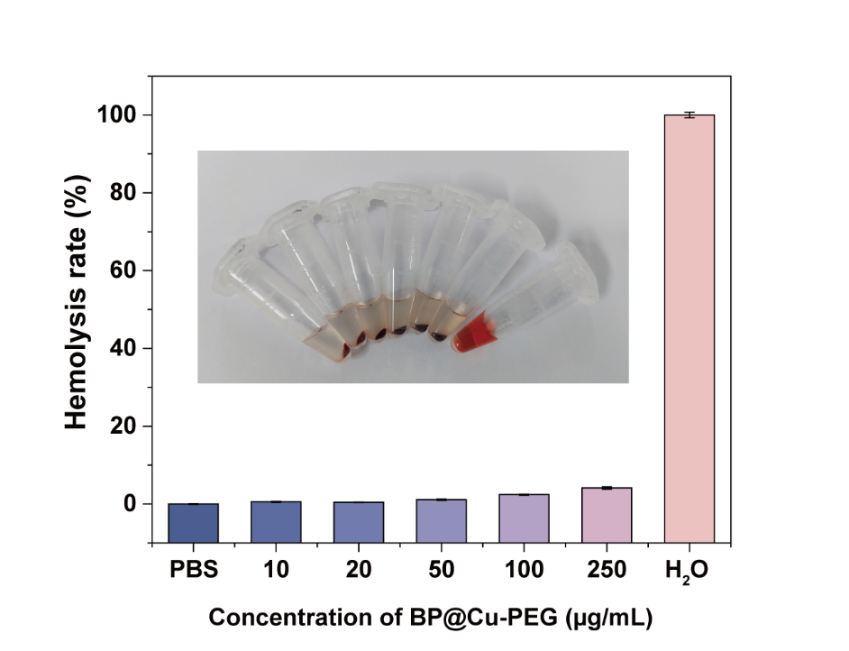


Figure S12. Hemocompatibility assessment of BPNS@Cu-PEG.Hemolysis rates of red blood cells after exposure to different concentrations of the nanoplatform. PBS and H₂O were used as negative and positive controls, respectively. Data are presented as mean ± s.d.; *n* = 3 independent experiments.


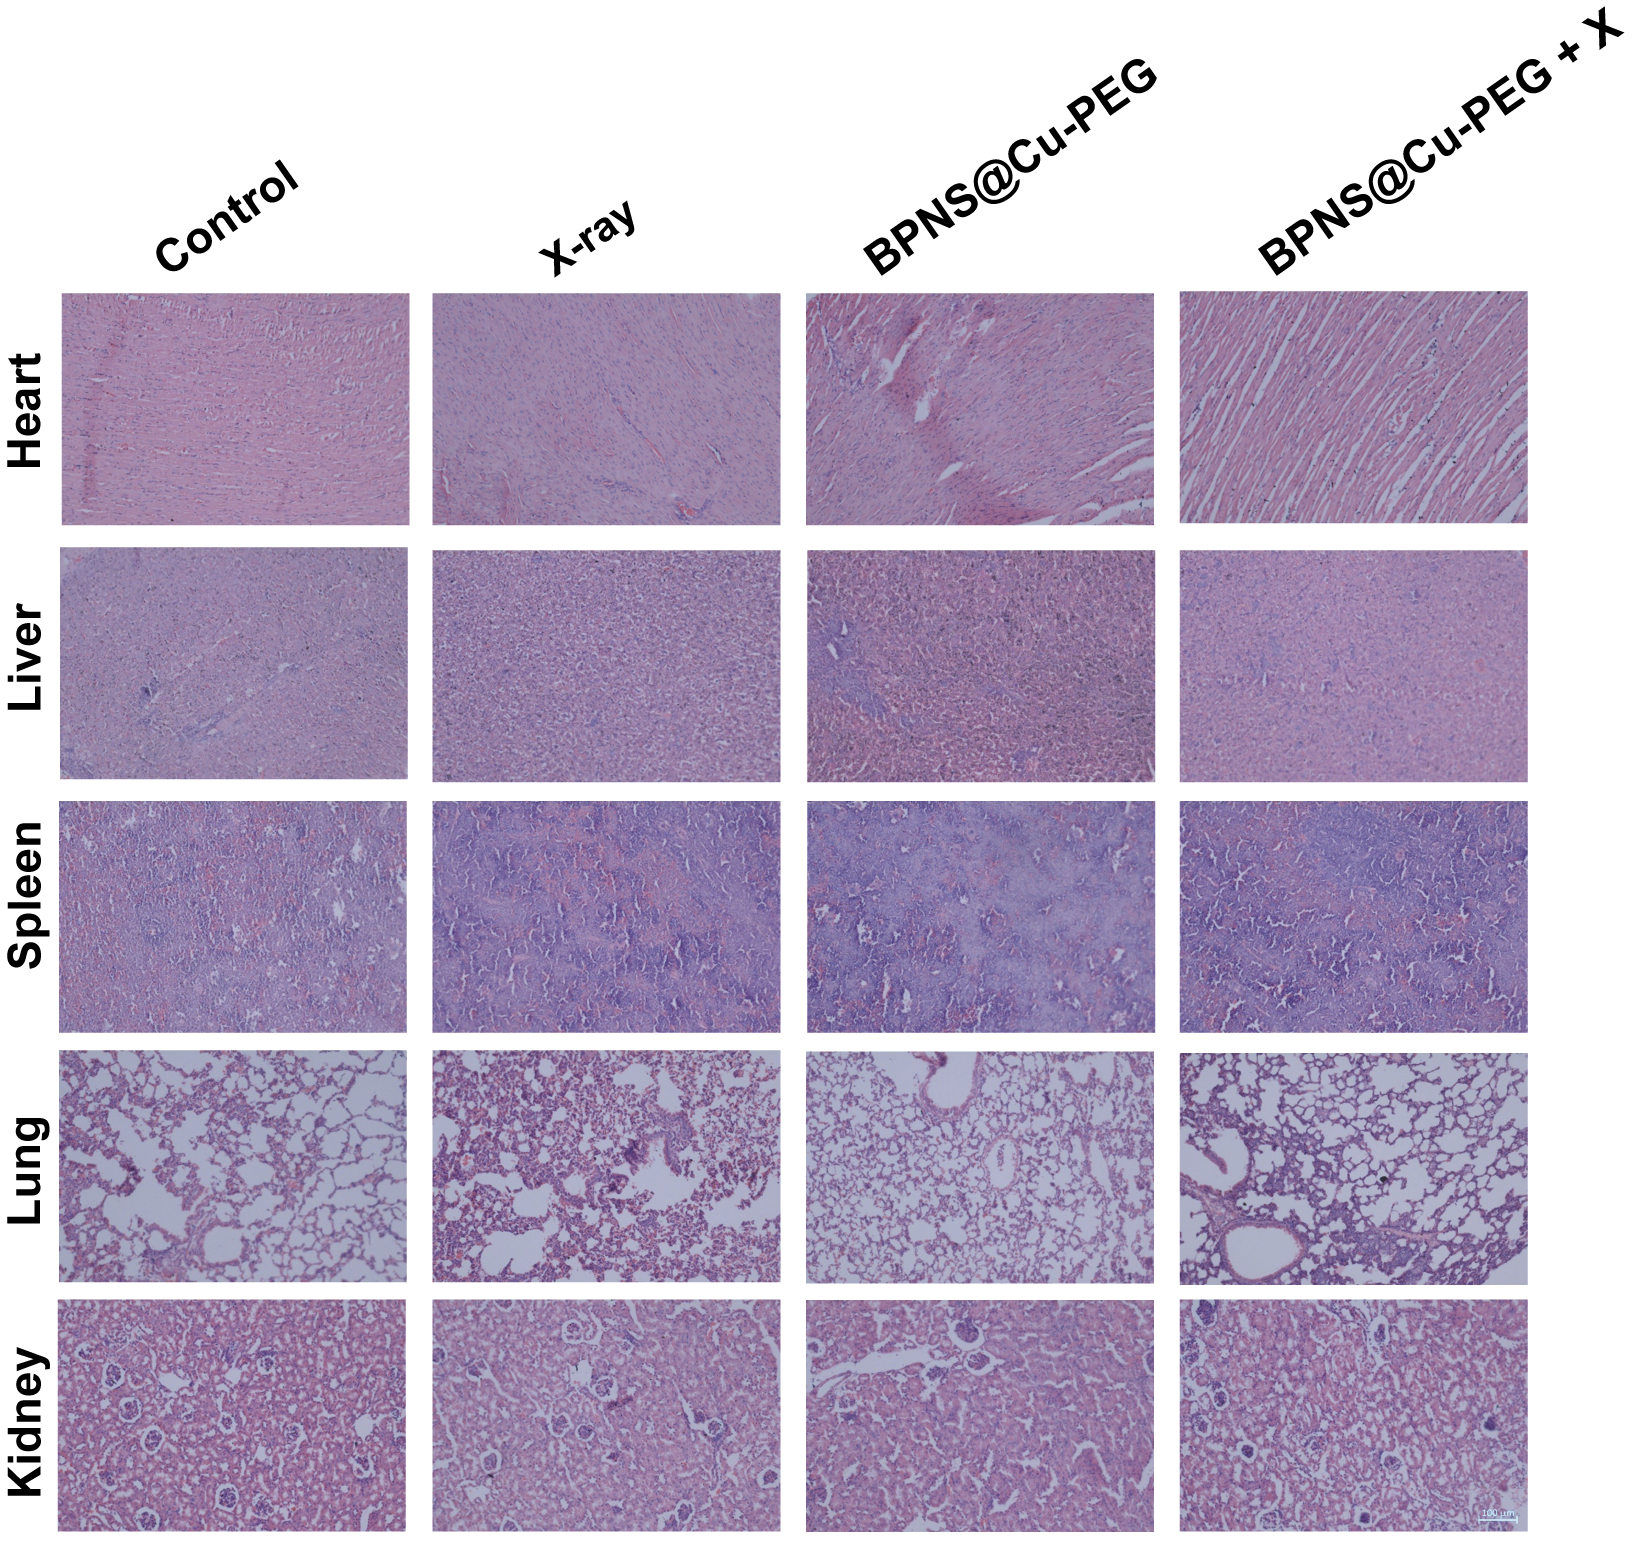


Figure S13. Histopathological analysis of major organ sections. H&E-stained images of the heart, liver, spleen, lungs, and kidneys from mice after treatment. Scale bar: 100 μm.


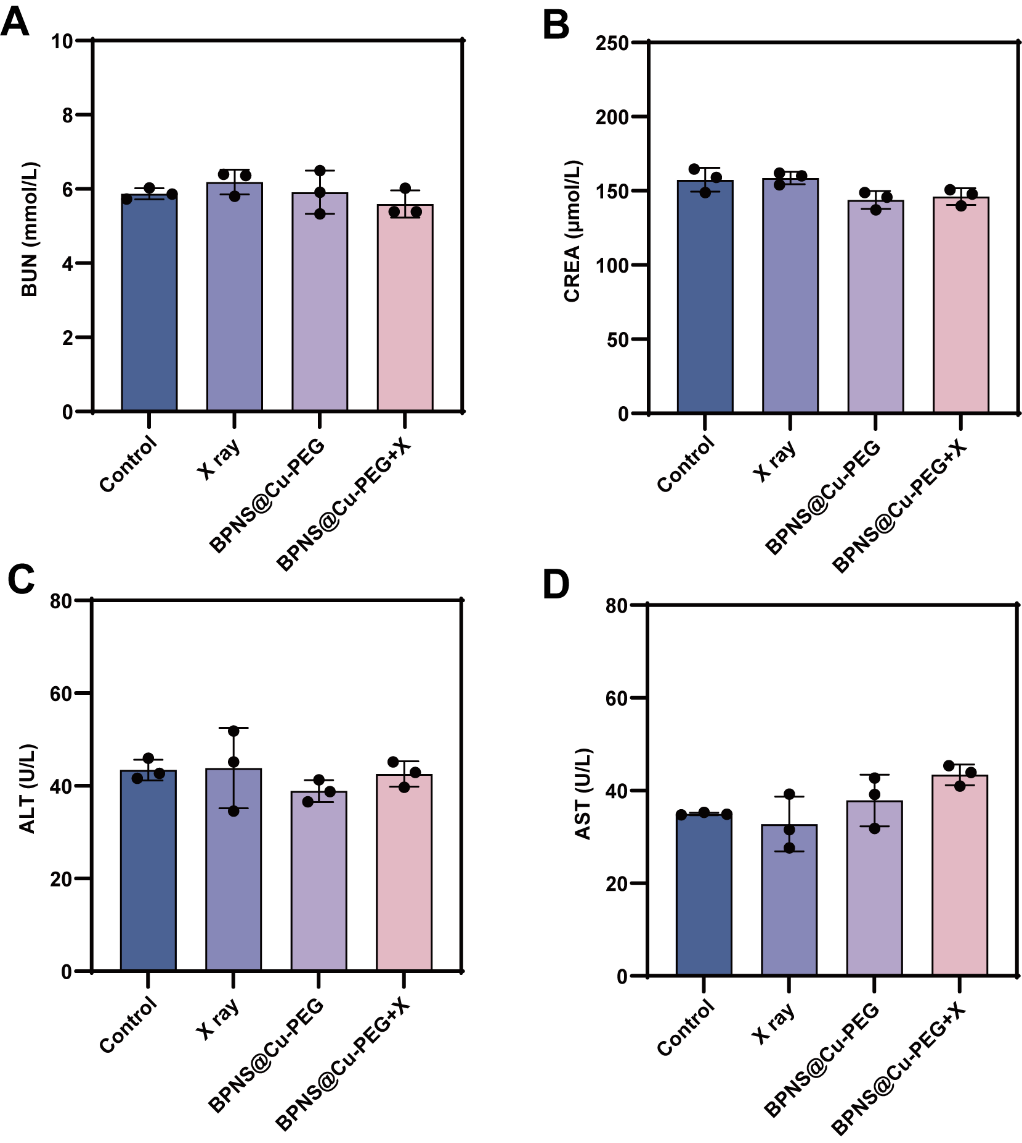


Figure S14. Evaluation of treatment-induced systemic toxicity via serum biochemistry. (A–D) Serum levels of (A) blood urea nitrogen (BUN), (B) creatinine (CREA), (C) alanine aminotransferase (ALT), and (D) aspartate aminotransferase (AST) across different treatment groups. Data are presented as mean ± s.d.; *n* = 3 biologically independent samples.
